# Supplementary material
Source: PubMed Central journal article supplement (PMC2276788)
Supplement: JCI0833869sd.pdf [file JCI0833869sd.pdf]

Lipocalin 2/Neutrophil gelatinase associated lipocalin mediates the apoptotic effect of 13-*cis* retinoic acid in human skin and SEB-1 sebocytes

Amanda M. Nelson<sup>1,3</sup>, Wei Zhao<sup>2</sup>, Kathryn L. Gilliland<sup>1,3</sup>, Andrea Zaenglein<sup>3</sup>, WenLei Liu<sup>2</sup>, and Diane M. Thiboutot<sup>1,3</sup>.

The Jake Gittlen Cancer Research Foundation<sup>1</sup>, Department of Health Evaluation Sciences<sup>2</sup>, and Department of Dermatology<sup>3</sup>, The Pennsylvania State University College of Medicine, Hershey PA

**Complete list: Significantly Changed genes in SEB-1 sebocytes after 72 hrs 13-*cis* RA**

| Probe ID   | Accession # | Fold Δ | Gene Title                                                                                      | Symbol   |
|------------|-------------|--------|-------------------------------------------------------------------------------------------------|----------|
| 1042_at    | U27185      | 12.25  | retinoic acid receptor responder (tazarotene induced) 1                                         | RARRES1  |
| 33505_at   | AI887421    | 9.89   | retinoic acid receptor responder (tazarotene induced) 1                                         | RARRES1  |
| 32821_at   | AI762213    | 7.04   | lipocalin 2 (oncogene 24p3)                                                                     | LCN2     |
| 38631_at   | M92357      | 5.95   | tumor necrosis factor, alpha-induced protein 2                                                  | TNFAIP2  |
| 32570_at   | L76465      | 5.91   | hydroxyprostaglandin dehydrogenase 15-(NAD)                                                     | HPGD     |
| 36105_at   | M18728      | 4.98   | carcinoembryonic antigen-related cell adhesion molecule 6 (non-specific cross reacting antigen) | CEACAM6  |
| 40071_at   | U03688      | 4.64   | cytochrome P450, family 1, subfamily B, polypeptide 1                                           | CYP1B1   |
| 859_at     | U03688      | 4.30   | cytochrome P450, family 1, subfamily B, polypeptide 1                                           | CYP1B1   |
| 37322_s_at | X82460      | 4.25   | hydroxyprostaglandin dehydrogenase 15-(NAD)                                                     | HPGD     |
| 1715_at    | U37518      | 4.18   | tumor necrosis factor (ligand) superfamily, member 10                                           | TNFSF10  |
| 1343_s_at  | S66896      | 3.70   | serine (or cysteine) proteinase inhibitor, clade B (ovalbumin), member 3                        | SERPINB3 |
| 873_at     | M26679      | 3.65   | homeo box A5                                                                                    | HOXA5    |
| 988_at     | X16354      | 3.52   | carcinoembryonic antigen-related cell adhesion molecule 1 (biliary glycoprotein)                | CEACAM1  |
| 1586_at    | M35878      | 3.43   | insulin-like growth factor binding protein 3                                                    | IGFBP3   |
| 36686_at   | U07919      | 3.29   | aldehyde dehydrogenase 1 family, member A3                                                      | ALDH1A3  |
| 33236_at   | AF060228    | 3.22   | retinoic acid receptor responder (tazarotene induced) 3                                         | RARRES3  |
| 37233_at   | AF079167    | 3.08   | oxidised low density lipoprotein (lectin-like) receptor 1                                       | OLR1     |
| 36609_at   | D26443      | 3.06   | solute carrier family 1 (glial high affinity glutamate transporter), member 3                   | SLC1A3   |
| 1890_at    | AB000584    | 3.00   | growth differentiation factor 15                                                                | GDF15    |
| 33131_at   | X70683      | 2.98   | SRY (sex determining region Y)-box 4                                                            | SOX4     |
| 35064_at   | X81006      | 2.74   | tripartite motif-containing 31                                                                  | TRIM31   |
| 2031_s_at  | U03106      | 2.60   | cyclin-dependent kinase inhibitor 1A (p21, Cip1)                                                | CDKN1A   |
| 40445_at   | AF017307    | 2.51   | E74-like factor 3 (ets domain transcription factor, epithelial-specific )                       | ELF3     |
| 37821_at   | AF041260    | 2.48   | breast carcinoma amplified sequence 1                                                           | BCAS1    |
| 37533_r_at | D86980      | 2.46   | tetratricopeptide repeat domain 9                                                               | TTC9     |
| 669_s_at   | L05072      | 2.42   | interferon regulatory factor 1                                                                  | IRF1     |
| 38584_at   | AF026939    | 2.42   | interferon-induced protein with tetratricopeptide repeats 3                                     | IFIT3    |
| 35029_at   | Y07828      | 2.35   | tripartite motif-containing 31                                                                  | TRIM31   |
| 41814_at   | M29877      | 2.29   | fucosidase, alpha-L- 1, tissue                                                                  | FUCA1    |
| 909_g_at   | M14660      | 2.23   | interferon-induced protein with tetratricopeptide repeats 2                                     | IFIT2    |
| 36634_at   | U72649      | 2.20   | BTG family, member 2                                                                            | BTG2     |
| 908_at     | M14660      | 2.20   | interferon-induced protein with tetratricopeptide repeats 2                                     | IFIT2    |
| 1582_at    | M29540      | 2.18   | carcinoembryonic antigen-related cell adhesion molecule 5                                       | CEACAM5  |
| 384_at     | X71874      | 2.09   | proteasome (prosome, macropain) subunit, beta type, 10                                          | PSMB10   |
| 41433_at   | M73255      | 2.08   | vascular cell adhesion molecule 1                                                               | VCAM1    |
| 39669_at   | AJ009985    | 2.07   | annexin A9                                                                                      | ANXA9    |
| 38389_at   | X04371      | 2.07   | 2',5'-oligoadenylate synthetase 1, 40/46kDa                                                     | OAS1     |
| 1882_g_at  | G4058-HT432 | 2.06   | ---                                                                                             | ---      |
| 33559_at   | U61412      | 1.94   | PTK6 protein tyrosine kinase 6                                                                  | PTK6     |

| Probe ID   | Accession # | Fold $\Delta$ | Gene Title                                                                                     | Symbol          |
|------------|-------------|---------------|------------------------------------------------------------------------------------------------|-----------------|
| 40511_at   | X58072      | 1.85          | GATA binding protein 3                                                                         | GATA3           |
| 38388_at   | M11810      | 1.82          | 2',5'-oligoadenylate synthetase 1, 40/46kDa                                                    | OAS1            |
| 38042_at   | X03674      | 1.79          | protein kinase C, alpha                                                                        | PRKCA           |
| 902_at     | L41939      | 1.78          | EPH receptor B2                                                                                | EPHB2           |
| 34162_at   | D84111      | 1.78          | RNA binding protein with multiple splicing                                                     | RBPMS           |
| 38269_at   | AL050147    | 1.77          | protein kinase D2                                                                              | PRKD2           |
| 38242_at   | AF068180    | 1.76          | B-cell linker                                                                                  | BLNK            |
| 37383_f_at | X58536      | 1.71          | major histocompatibility complex, class I, B /// major histocompatibility complex, class I, C  | HLA-B /// HLA-C |
| 39665_at   | U33267      | 1.71          | glycine receptor, beta                                                                         | GLRB            |
| 881_at     | M35198      | 1.71          | integrin, beta 6                                                                               | ITGB6           |
| 544_at     | S76638      | 1.70          | nuclear factor of kappa light polypeptide gene enhancer in B-cells 2 (p49/p100)                | NFKB2           |
| 37643_at   | X63717      | 1.69          | Fas (TNF receptor superfamily, member 6)                                                       | FAS             |
| 33267_at   | AF035315    | 1.66          | ATPase, aminophospholipid transporter (APLT), Class I, type 8A, member 1                       | ATP8A1          |
| 1562_g_at  | U27193      | 1.66          | dual specificity phosphatase 8                                                                 | DUSP8           |
| 37451_at   | AL109695    | 1.62          | solute carrier organic anion transporter family, member 3A1                                    | SLCO3A1         |
| 35194_at   | X53463      | 1.60          | glutathione peroxidase 2 (gastrointestinal)                                                    | GPX2            |
| 34213_at   | AB020676    | 1.59          | KIBRA protein                                                                                  | KIBRA           |
| 40898_at   | U46751      | 1.56          | sequestosome 1                                                                                 | SQSTM1          |
| 322_at     | D88532      | 1.47          | phosphoinositide-3-kinase, regulatory subunit 3 (p55, gamma)                                   | PIK3R3          |
| 39015_f_at | L42611      | -4.76         | keratin 6A /// keratin 6C                                                                      | KRT6A KRT6C     |
| 34721_at   | U42031      | -4.00         | FK506 binding protein 5                                                                        | FKBP5           |
| 39016_r_at | L42611      | -3.85         | keratin 6A /// keratin 6C                                                                      | KRT6A KRT6C     |
| 33821_at   | AL034374    | -3.23         | ELOVL family member 5, elongation of long chain fatty acids (FEN1/Elo2, SUR4/Elo3-like, yeast) | ELOVL5          |
| 1610_s_at  | J00139      | -3.12         | dihydrofolate reductase                                                                        | DHFR            |
| 32005_at   | M57703      | -2.78         | pro-melanin-concentrating hormone                                                              | PMCH            |
| 39681_at   | AF060568    | -2.70         | zinc finger and BTB domain containing 16                                                       | ZBTB16          |
| 36739_at   | U54617      | -2.56         | pyruvate dehydrogenase kinase, isoenzyme 4                                                     | PDK4            |
| 31691_g_at | U08997      | -2.50         | glutamate dehydrogenase 1                                                                      | GLUD1           |
| 36922_at   | X59618      | -2.27         | ribonucleotide reductase M2 polypeptide                                                        | RRM2            |
| 32251_at   | AA149307    | -2.27         | transcription elongation factor A (SII)-like 4                                                 | TCEAL4          |
| 36270_at   | U04343      | -2.13         | CD86 antigen (CD28 antigen ligand 2, B7-2 antigen)                                             | CD86            |
| 39677_at   | D80008      | -2.04         | DNA replication complex GINS protein PSF1                                                      | PSF1            |
| 40137_at   | M31724      | -2.04         | protein tyrosine phosphatase, non-receptor type 1                                              | PTPN1           |
| 34944_at   | U51704      | -2.04         | ---                                                                                            | ---             |
| 39153_r_at | U06632      | -1.96         | coilin                                                                                         | COIL            |
| 779_at     | D21337      | -1.92         | collagen, type IV, alpha 6                                                                     | COL4A6          |
| 37062_at   | S62907      | -1.92         | gamma-aminobutyric acid (GABA) A receptor, alpha 2                                             | GABRA2          |
| 32283_at   | AI239869    | -1.89         | Iduronate 2-sulfatase                                                                          | MPS2            |
| 39338_at   | AI201310    | -1.82         | S100 calcium binding protein A10 (annexin II ligand, calpactin I, light polypeptide (p11))     | S100A10         |
| 115_at     | X14787      | -1.79         | thrombospondin 1                                                                               | THBS1           |
| 36104_at   | AA526497    | -1.79         | ubiquinol-cytochrome c reductase hinge protein                                                 | UQCRH           |
| 35938_at   | M72393      | -1.79         | phospholipase A2, group IVA (cytosolic, calcium-dependent)                                     | PLA2G4A         |
| 35342_at   | AF052159    | -1.72         | protein tyrosine phosphatase-like (proline instead of catalytic arginine), member b            | PTPLB           |
| 1536_at    | U77949      | -1.64         | CDC6 cell division cycle 6 homolog (S. cerevisiae)                                             | CDC6            |
| 41547_at   | AF047472    | -1.59         | BUB3 budding uninhibited by benzimidazoles 3 homolog (yeast)                                   | BUB3            |
| 41529_g_at | W72239      | -1.49         | hypothetical protein LOC130074                                                                 | LOC130074       |

Lipocalin 2/Neutrophil gelatinase associated lipocalin mediates the apoptotic effect of 13-*cis* retinoic acid in human skin and SEB-1 sebocytes

Amanda M. Nelson<sup>1,3</sup>, Wei Zhao<sup>2</sup>, Kathryn L. Gilliland<sup>1,3</sup>, Andrea Zaenglein<sup>3</sup>, WenLei Liu<sup>2</sup>, and Diane M. Thiboutot<sup>1,3</sup>.

The Jake Gittlen Cancer Research Foundation<sup>1</sup>, Department of Health Evaluation Sciences<sup>2</sup>, and Department of Dermatology<sup>3</sup>, The Pennsylvania State University College of Medicine, Hershey PA

**Complete list: Significantly Changed genes after one-week Isotretinoin treatment.**

| Probe ID    | Accession # | Fold $\Delta$ | Gene Title                                                             | Symbol   |
|-------------|-------------|---------------|------------------------------------------------------------------------|----------|
| 212531_at   | NM_005564   | 7.03          | lipocalin 2 (oncogene 24p3)                                            | LCN2     |
| 205916_at   | NM_002963   | 6.20          | S100 calcium binding protein A7 (psoriasin 1)                          | S100A7   |
| 203535_at   | NM_002965   | 4.53          | S100 calcium binding protein A9 (calgranulin B)                        | S100A9   |
| 219874_at   | NM_024628   | 3.78          | solute carrier family 12 (K/Cl transporters)                           | SLC12A8  |
| 206754_s_at | NM_000767   | 3.32          | cytochrome P450, family 2, subfamily B                                 | CYP2B7P1 |
| 202376_at   | NM_001085   | 2.61          | serine (or cysteine) proteinase inhibitor                              | SERPINA3 |
| 206392_s_at | NM_002888   | 2.61          | retinoic acid receptor responder (TIG 1)                               | RARRES1  |
| 221872_at   | AI669229    | 2.45          | retinoic acid receptor responder (TIG 1)                               | RARRES1  |
| 206391_at   | NM_002888   | 2.42          | retinoic acid receptor responder (TIG 1)                               | RARRES1  |
| 218960_at   | NM_016425   | 2.35          | transmembrane protease, serine 4                                       | TMPRSS4  |
| 206478_at   | NM_014792   | 2.27          | KIAA0125                                                               | KIAA0125 |
| 219014_at   | NM_016619   | 2.21          | placenta-specific 8                                                    | PLAC8    |
| 219554_at   | NM_016321   | 2.08          | Rhesus blood group, C glycoprotein                                     | RHCG     |
| 221605_s_at | AF136970    | 2.04          | pipecolic acid oxidase                                                 | PIPOX    |
| 204351_at   | NM_005980   | 1.99          | S100 calcium binding protein P                                         | S100P    |
| 218498_s_at | NM_014584   | 1.96          | ERO1-like (S. cerevisiae)                                              | ERO1L    |
| 207367_at   | NM_001676   | 1.92          | ATPase, H <sup>+</sup> /K <sup>+</sup> transporting, nongastric, alpha | ATP12A   |
| 216598_s_at | S69738      | 1.91          | chemokine (C-C motif) ligand 2                                         | CCL2     |
| 203423_at   | NM_002899   | 1.81          | retinol binding protein 1, cellular                                    | RBP1     |
| 219795_at   | NM_007231   | 1.69          | solute carrier family 6 (amino acid transporter)                       | SLC6A14  |
| 210827_s_at | U73844      | 1.67          | E74-like factor 3 (ets domain transcription factor)                    | ELF3     |
| 221701_s_at | AF352728    | 1.62          | stimulated by retinoic acid gene 6 homolog                             | STRA6    |
| 204541_at   | NM_012429   | 1.57          | SEC14-like 2 (S. cerevisiae)                                           | SEC14L2  |
| 202575_at   | NM_001878   | 1.56          | cellular retinoic acid binding protein 2                               | CRABP2   |
| 210397_at   | U73945      | 1.52          | defensin, beta 1                                                       | DEFB1    |
| 205428_s_at | NM_001740   | 1.51          | calbindin 2, 29kDa (calretinin)                                        | CALB2    |
| 204268_at   | NM_005978   | 1.50          | S100 calcium binding protein A2                                        | S100A2   |
| 214088_s_at | AW080549    | 1.49          | fucosyltransferase 3                                                   | FUT3     |
| 214599_at   | NM_005547   | 1.49          | involucrin                                                             | IVL      |
| 205926_at   | NM_004843   | 1.49          | interleukin 27 receptor, alpha                                         | IL27RA   |
| 219578_s_at | AF329403    | 1.48          | cytoplasmic polyadenylation element BP 1                               | CPEB1    |
| 216379_x_at | AK000168    | 1.43          | CD24 antigen                                                           | CD24     |
| 221577_x_at | BC000529    | 1.41          | growth differentiation factor 15                                       | GDF15    |
| 213316_at   | AL050154    | 1.40          | KIAA1462                                                               | KIAA1462 |
| 205185_at   | NM_006846   | 1.39          | serine protease inhibitor, Kazal type 5                                | SPINK5   |
| 219956_at   | NM_007210   | 1.38          | UDP-N-acetyl-alpha-D-galactosamine                                     | GALNT6   |

| <b>Probe ID</b> | <b>Accession #</b> | <b>Fold <math>\Delta</math></b> | <b>Gene Title</b>                                 | <b>Symbol</b> |
|-----------------|--------------------|---------------------------------|---------------------------------------------------|---------------|
| 212715_s_at     | AB020626           | 1.27                            | microtubule associated monooxygenase              | MICAL3        |
| 218963_s_at     | NM_015515          | 1.26                            | keratin 23 (histone deacetylase inducible)        | KRT23         |
| 206143_at       | NM_000111          | -2.29                           | solute carrier family 26, member 3                | SLC26A3       |
| 206214_at       | NM_005084          | -2.27                           | phospholipase A2, group VII (PAF acetylhydrolase) | PLA2G7        |
| 206623_at       | NM_000440          | -2.13                           | phosphodiesterase 6A, cGMP-specific, rod, alpha   | PDE6A         |
| 206100_at       | NM_001874          | -1.55                           | carboxypeptidase M                                | CPM           |
| 207030_s_at     | NM_001321          | -1.50                           | cysteine and glycine-rich protein 2               | CSRP2         |
